# Supplementary material
Source: Springer Nature journal article supplement (https://www.springerprofessional.de/resource/supplementary/13638_2012_544_MOESM9_ESM.pdf/11898030)

Frequency Response of IIR Filter For  $q=0.5$   $a=0.5$ 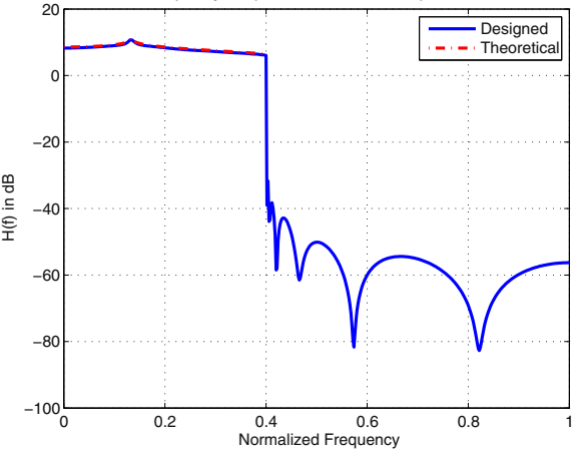

Supplement: MOESM9 [file 11898030]
